# Supplementary material for: Novel magnetic nickel ferrite nanoparticles modified with poly(aniline-co-o-toluidine) for the removal of hazardous 2,4-dichlorophenol pollutant from aqueous solutions
Source: Royal Society of Chemistry journal article supplement (doi:10.1039/d2ra00034b), 2022-01-01
Supplement: d2ra00034b1.pdf [file d2ra00034b1.pdf]

Supplementary Figures for:

# Novel Magnetic Nickel Ferrite Nanoparticles Modified with Poly(aniline-co-o-toluidine) for the Removal of Hazardous 2,4-Dichlorophenol Pollutant from Aqueous Solutions

Mahmoud Abdelwahab Fathy,<sup>a</sup> Ayman H. Kamel<sup>a,b\*</sup> and Saad S. M. Hassan <sup>a\*</sup>

<sup>a</sup>*Department of Chemistry, Faculty of Science, Ain Shams University, Cairo 11566, Egypt.*

<sup>b</sup>*Chemistry Department, College of Science, Sakhir 32038, Kingdom of Bahrain*

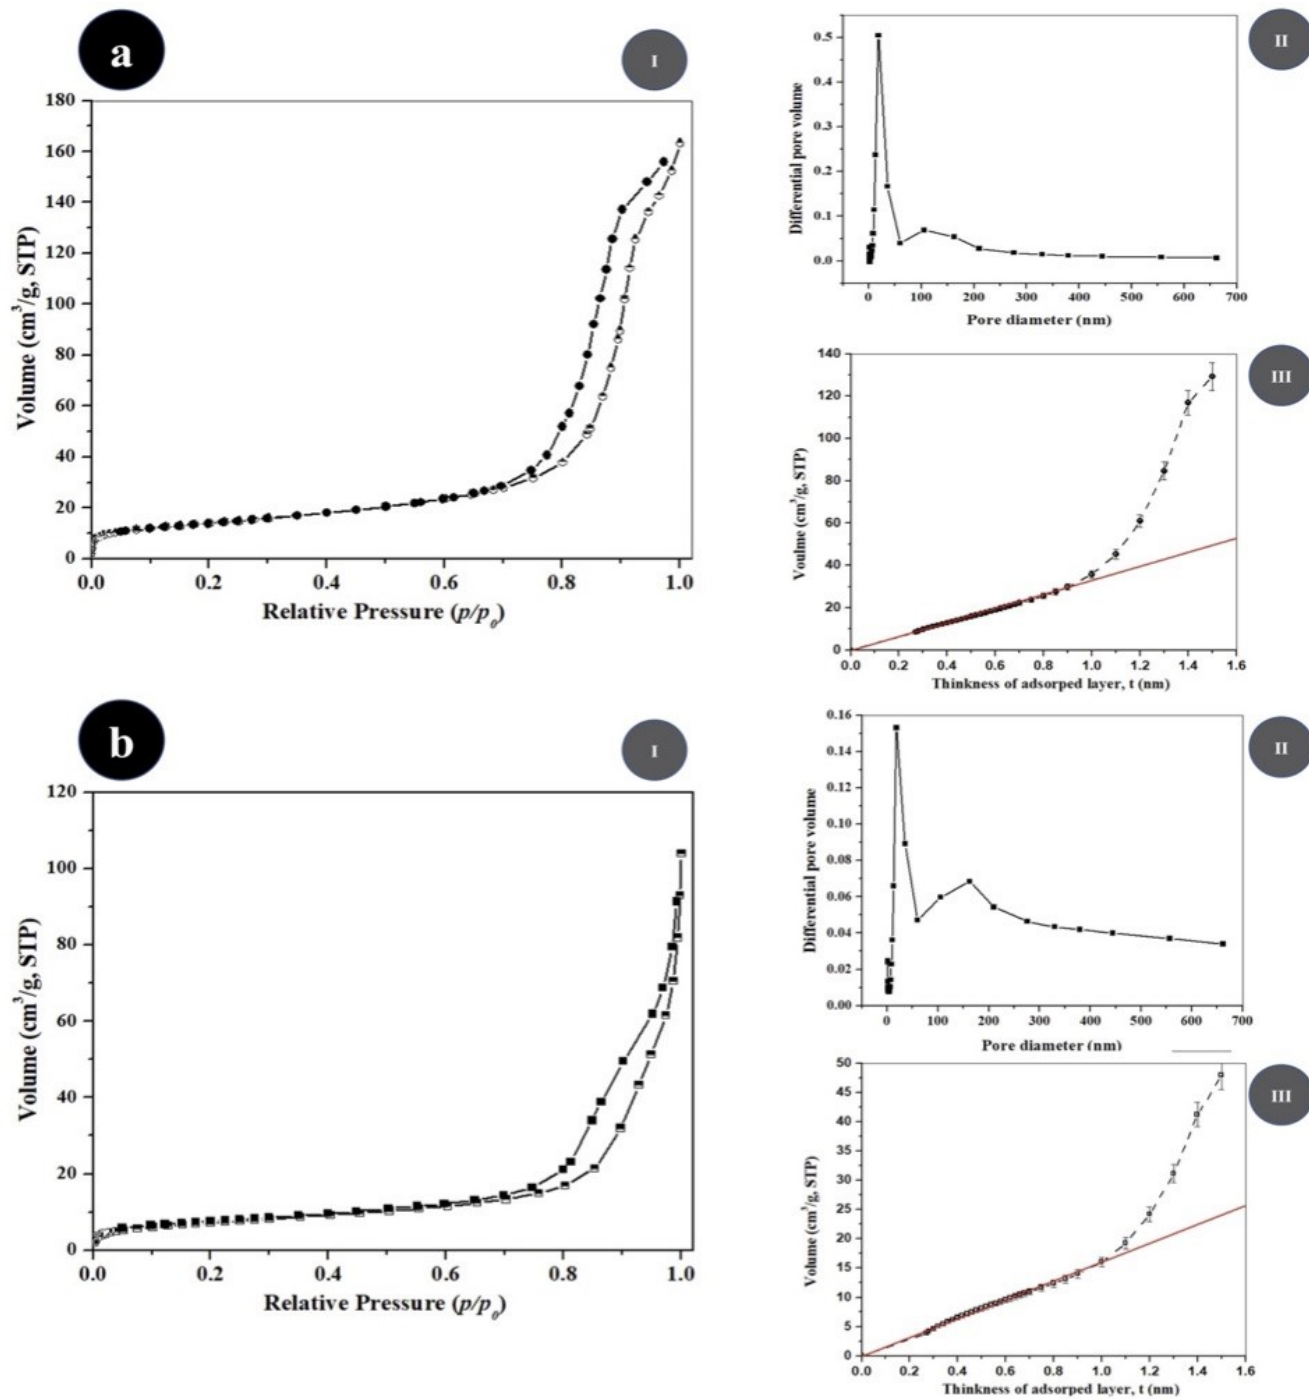

**Figure S1.** Nitrogen adsorption/desorption isotherms (I), pore size distribution (II) and t-plot (III) for both  $\text{NiFe}_2\text{O}_4$  nanoparticles (a) and  $\text{NiFe}_2\text{O}_4/\text{PAOT}$  nanocomposites (b); respectively.
